# Supplementary material for: Selective O-acyl ring-opening of β-butyrolactone catalyzed by trifluoromethane sulfonic acid: application to the preparation of well-defined block copolymers
Source: Royal Society of Chemistry journal article supplement (doi:10.1039/c3py00935a), 2013-08-07
Supplement: c3py00935a.pdf [file c3py00935a.pdf]

## Supporting Information

### **Selective *O*-acyl Ring-Opening of $\beta$ -Butyrolactone Catalyzed by Trifluoromethane Sulfonic Acid: Application to the Preparation of Well-defined Block Copolymers**

*Aline Couffin,<sup>a</sup> Blanca Martín-Vaca,<sup>a,\*</sup> Didier Bourissou,<sup>a,\*</sup> Christophe Navarro<sup>b</sup>*

<sup>a</sup>Laboratoire Hétérochimie Fondamentale et Appliquée, UMR CNRS 5069, Université de Toulouse, UPS, 118 Route de Narbonne, F-31062 Toulouse, France.

<sup>b</sup>Arkema, Lacq Research Center, Po Box 34, 64170 Lacq (France).

\*To whom correspondence should be addressed: Phone (+33)(0)561556803, Fax (+33)(0)561558204, E-mail: dbouriss@chimie.ups-tlse.fr

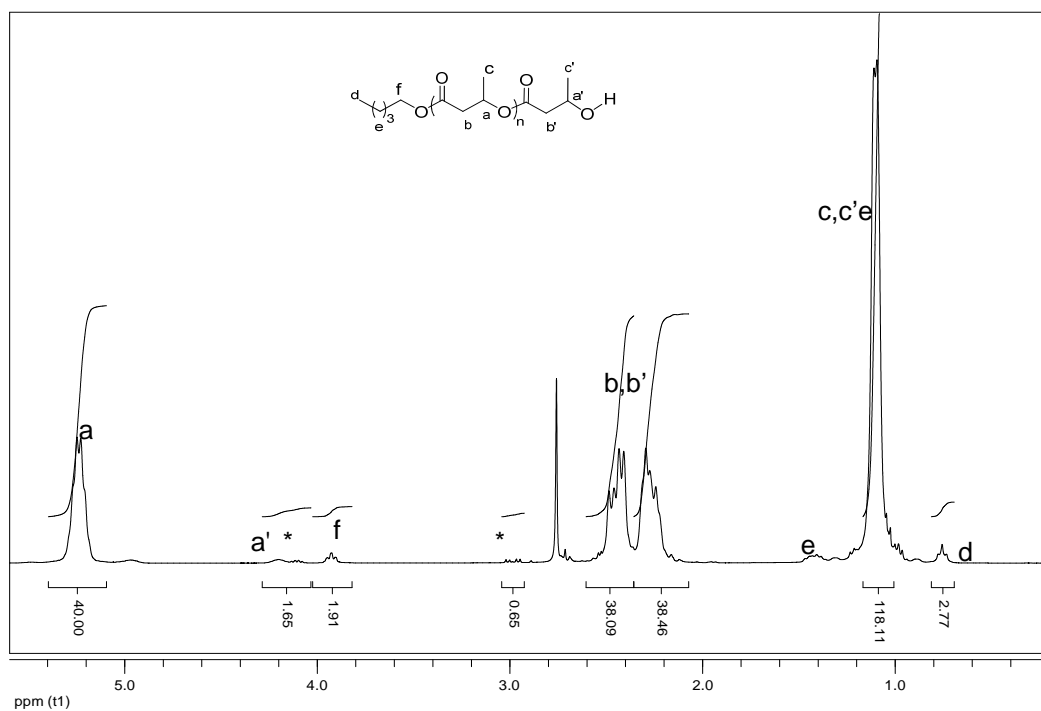

**Figure S1.**  $^1\text{H}$  NMR spectrum ( $\text{CDCl}_3$ , 300 MHz) of a PBL prepared with MSA as catalyst. Polymerization conditions: Run 2 in Table 1. \* Residual monomer.

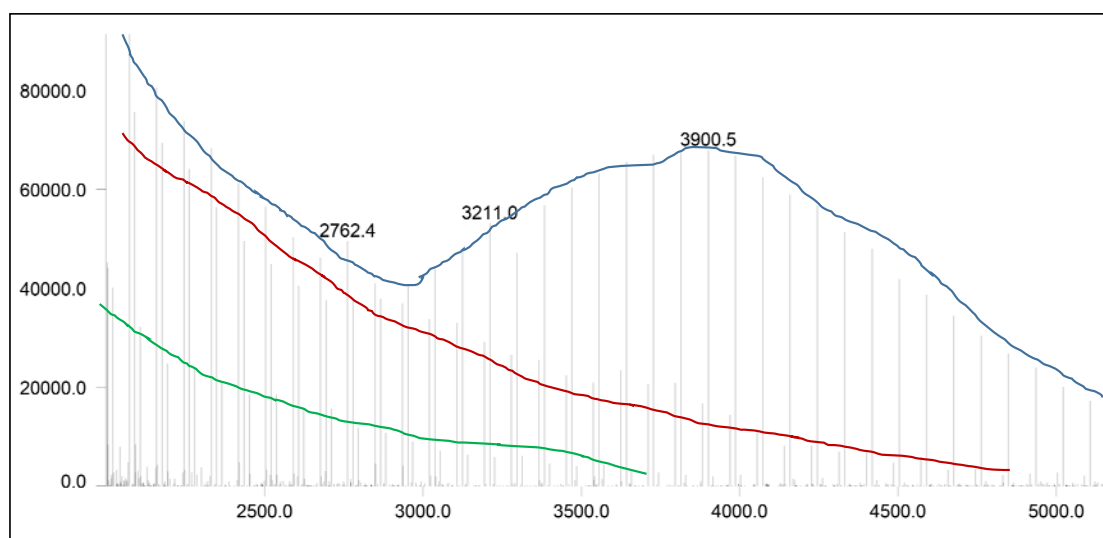

**Figure S2.** MALDI-TOF mass spectrum (Region  $m/z$  2 000 to 5 000) of a  $\text{PBL}_{40}$  polymer. (Polymerization conditions: Run 2 Table 1). Blue: population of polymer chains initiated by  $n$ -pentanol  $M = 88(M_{n\text{-pentOH}}) + n \times 86.09(M_{\beta\text{-BL}}) + 23(\text{Na}^+)$ . Red: population of cyclic polymer chains; Green: population of polymer chains initiated by  $n$ -pentanol and resulting from crotonisation reaction  $M = 88(M_{n\text{-pentOH}}) + n \times 86.09(M_{\beta\text{-BL}}) + 23(\text{Na}^+) + 69 (M_{\text{C}_4\text{H}_5\text{O}})$ .

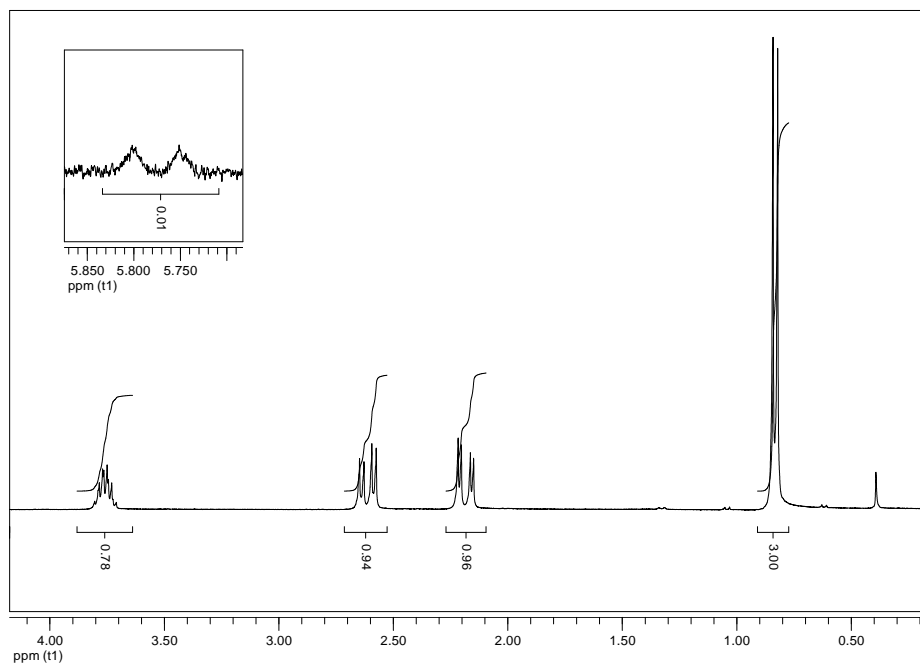

**Figure S3.**  $^1\text{H}$  NMR spectrum ( $\text{CDCl}_3$ , 300MHz) of distilled  $\beta$ -BL. Signal at  $\delta$  5.77 ppm corresponds to olefinic H atoms resulting from crotonisation reactions.

**Table S1.**  $\beta$ -BL/ $\epsilon$ -CL copolymerization reactions catalysed by  $\text{HOTf}^a$

| run | Init.                               | [BL]/[CL]          | % $\beta$ -BL <sup>b</sup> | $M_n^c$<br>(g/mol) | $\bar{D}^c$ |
|-----|-------------------------------------|--------------------|----------------------------|--------------------|-------------|
| 1   | $\text{C}_5\text{H}_{11}\text{OH}$  | 20/20 <sup>d</sup> | 47                         | 5 160              | 1.16        |
| 2   | $\text{C}_5\text{H}_{11}\text{OH}$  | 20/20              | 46                         | 6 670              | 1.21        |
| 3   | $\text{C}_5\text{H}_{11}\text{OH}$  | 60/60              | 48                         | 14 690             | 1.30        |
| 4   | $\text{C}_4\text{H}_8(\text{OH})_2$ | 120/0              | 100                        | 10 730             | 1.18        |
|     |                                     | 120/160            | 42                         | 28 700             | 1.33        |
| 5   | $\text{PEG}_{10000}(\text{OH})_2$   | 60/0               | 100                        | 16 730             | 1.23        |
| 6   | $\text{PEG}_{1500}(\text{OH})_2$    | 60/0               | 100                        | 5 600              | 1.26        |
|     |                                     | 60/60              | 51                         | 9 900              | 1.46        |
| 7   | Krazol LBH-P                        | 60/0               | 100                        | 9 870              | 1.21        |
|     |                                     | 60/60              | 49                         | 16 790             | 1.40        |

<sup>a</sup>Polymerization of  $\beta$ -butyrolactone carried out at 30 °C in  $\text{C}_6\text{D}_6$  solution.

<sup>b</sup>Determined by  $^1\text{H}$  NMR spectroscopy.

<sup>c</sup>Obtained from size exclusion chromatography analysis in tetrahydrofuran using polystyrene standards.

<sup>d</sup>PCL-*b*-PBL prepared by ROP of  $\epsilon$ -CL first.

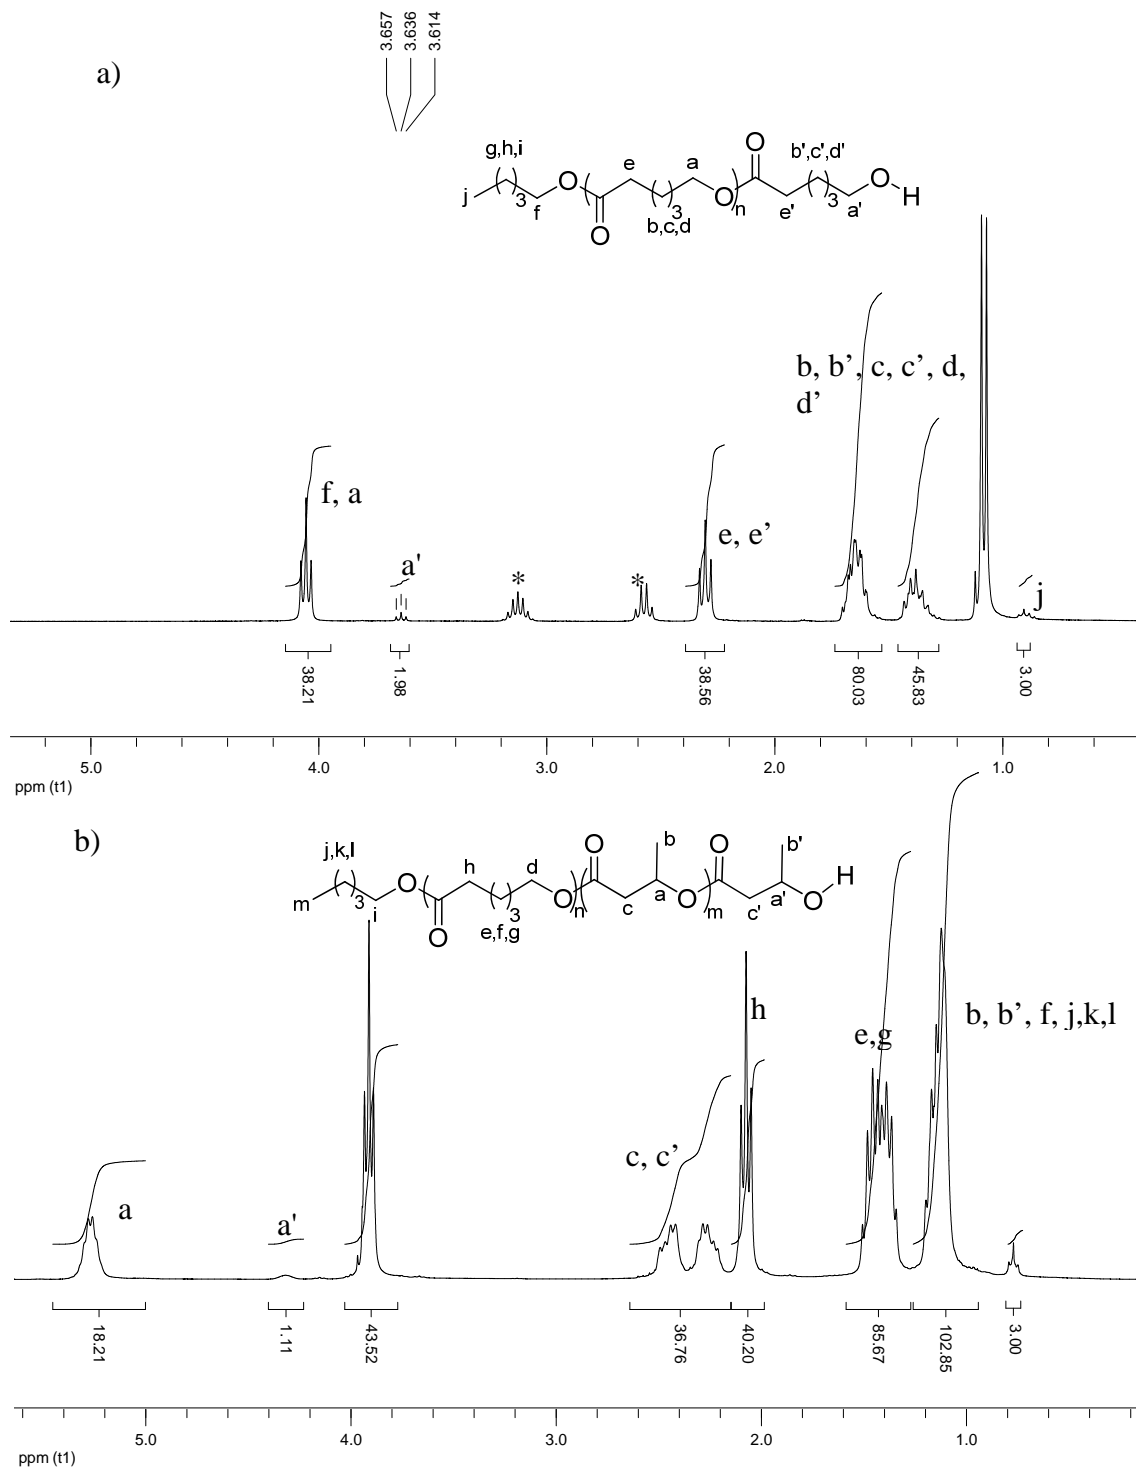

**Figure S4.**  $^1\text{H}$  NMR spectrum ( $\text{CDCl}_3$ , 300 MHz) of the block copolymer  $\text{PCL}_{20}\text{-}b\text{-PBL}_{20}$  ( $M_n = 5\ 160$  g/mol): a) After polymerization of the  $\epsilon\text{-CL}$  initially feed. b)  $^1\text{H}$  NMR spectrum of the final  $\text{PCL}_{20}\text{-}b\text{-PBL}_{20}$  copolymer. Polymerization conditions: Run 1 in Table S1. \* refers to the DIEA.HOTf salt.

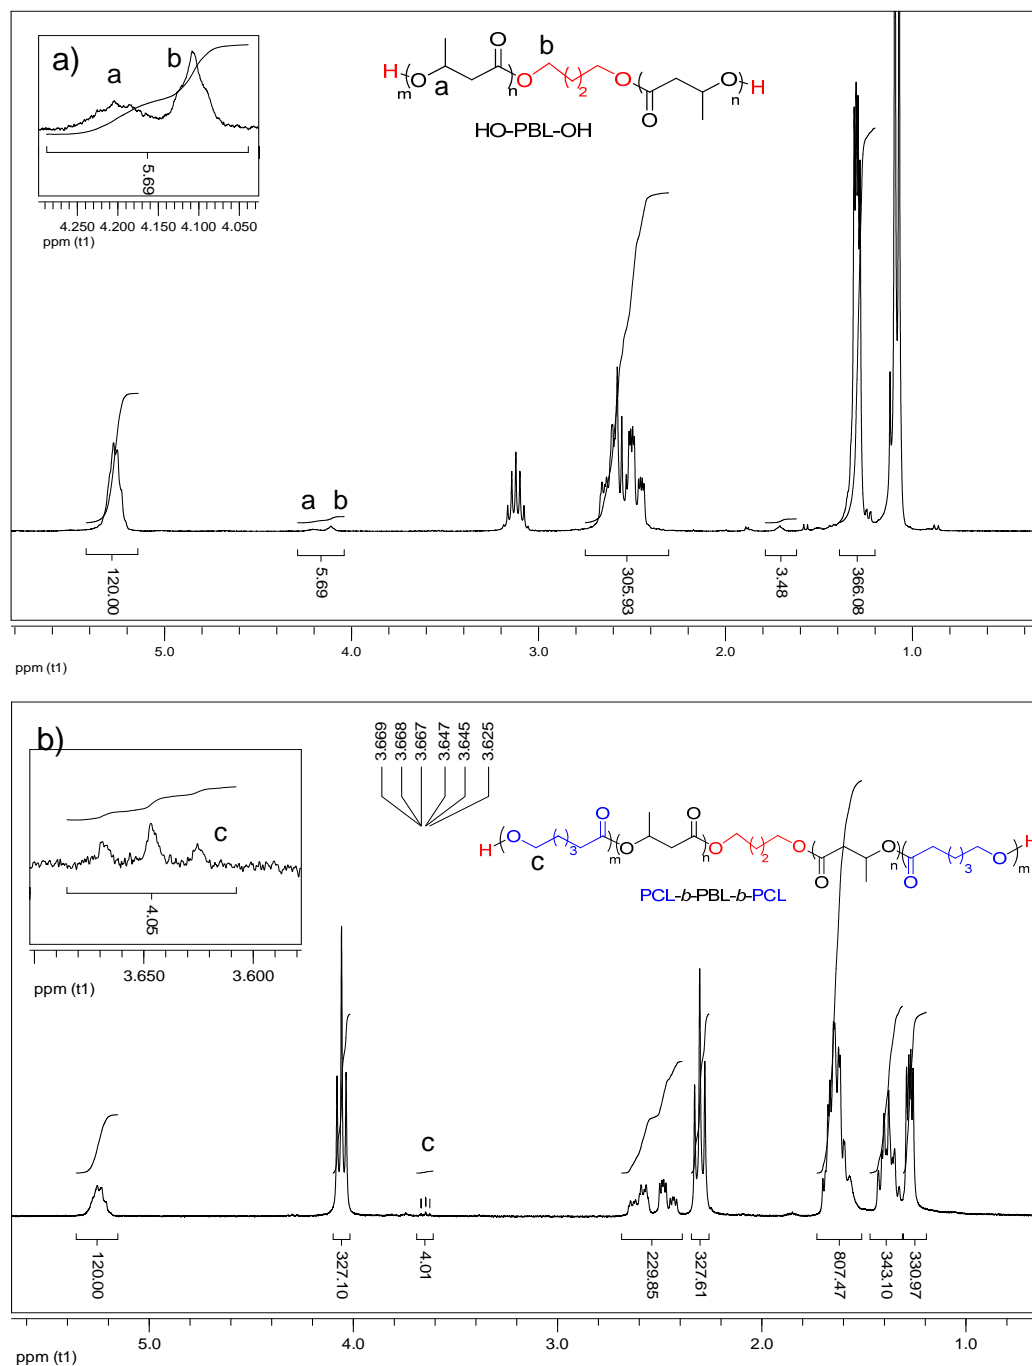

**Figure S5.** <sup>1</sup>H NMR spectrum (CDCl<sub>3</sub>, 300 MHz) of the telechelic HO-PBL-OH (a) and of the triblock copolymer PCL-*b*-PBL-*b*-PCL (b) ( $M_n = 28\,700$  g/mol): Polymerization conditions: Run 4 in Table S1.

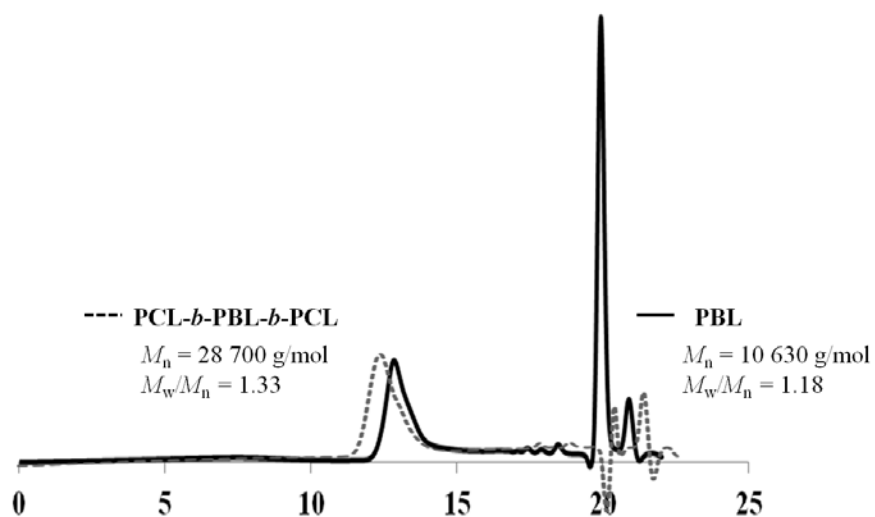

**Figure S6.** SEC traces of the telechelic HO-PBL-OH block and final PCL-*b*-PBL-*b*-PCL copolymer

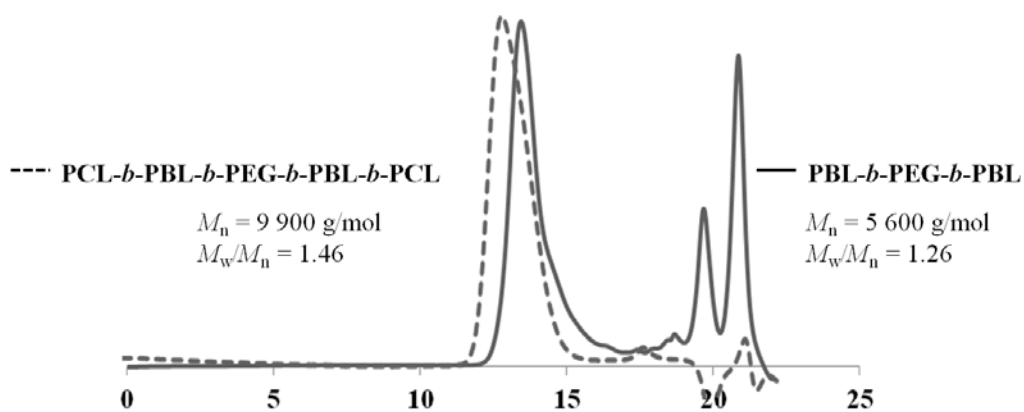

**Figure S7.** SEC traces of the telechelic HO-PBL-*b*-PEG-*b*-PBL-OH block and final PCL-*b*-PBL-*b*-PEG-*b*-PBL-*b*-PCL copolymer

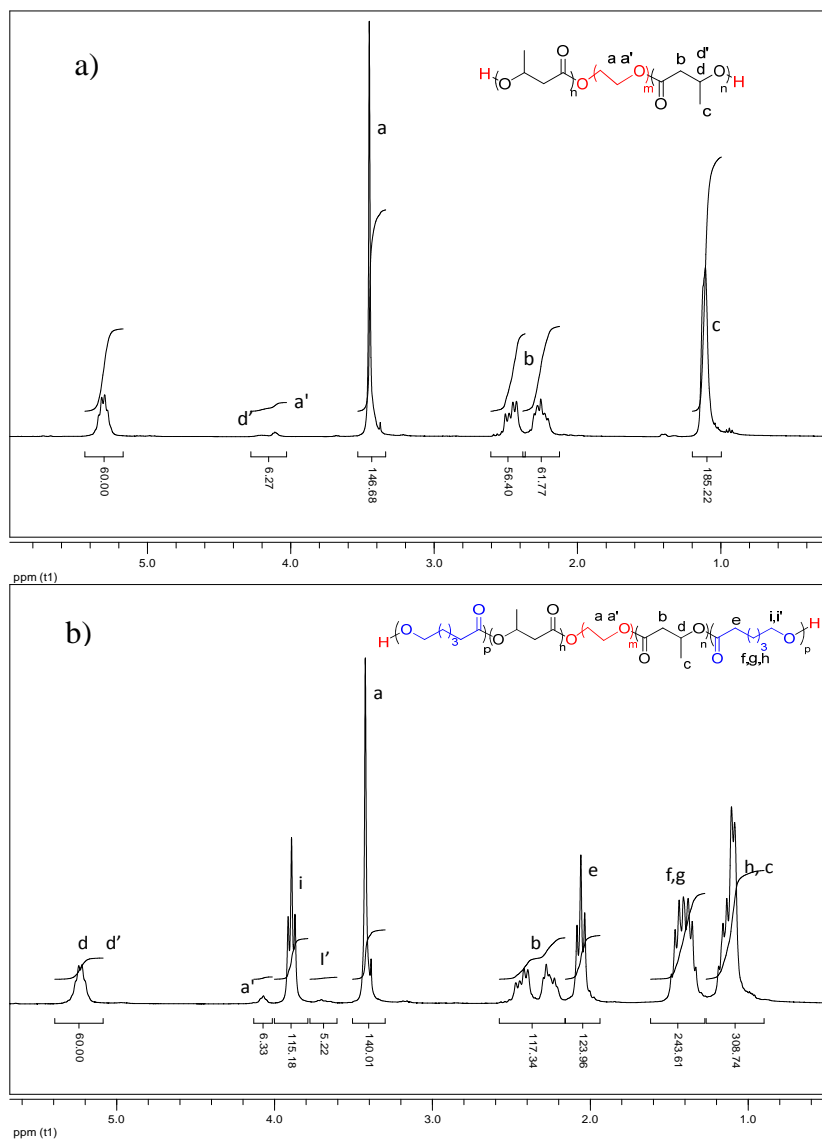

**Figure S8.**  $^1\text{H}$  NMR spectrum ( $\text{CDCl}_3$ , 300 MHz) of the block copolymer  $\text{PCL-}b\text{-PBL-}b\text{-PEG-}b\text{-PBL-}b\text{-PCL}$ : Polymerization conditions: Run 6 in Table S1. a)  $\text{PBL-}b\text{-PEG-}b\text{-PBL}$ ; b)  $\text{PCL-}b\text{-PBL-}b\text{-PEG-}b\text{-PBL-}b\text{-PCL}$

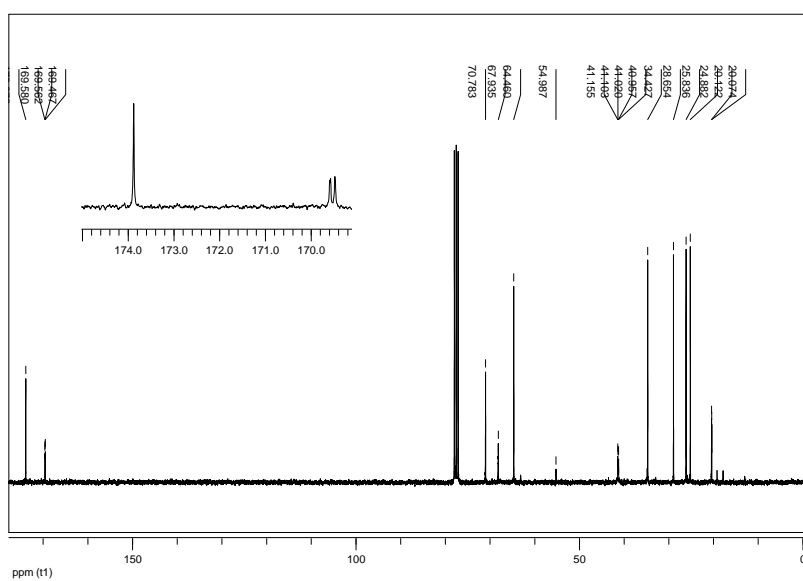

**Figure S9.**  $^{13}\text{C}$  NMR spectrum ( $\text{CDCl}_3$ , 75 MHz) of the block copolymer  $\text{PCL-}b\text{-PBL-}b\text{-PEG-}b\text{-PBL-}b\text{-PCL}$ : Polymerization conditions: Run 6 in Table S1.

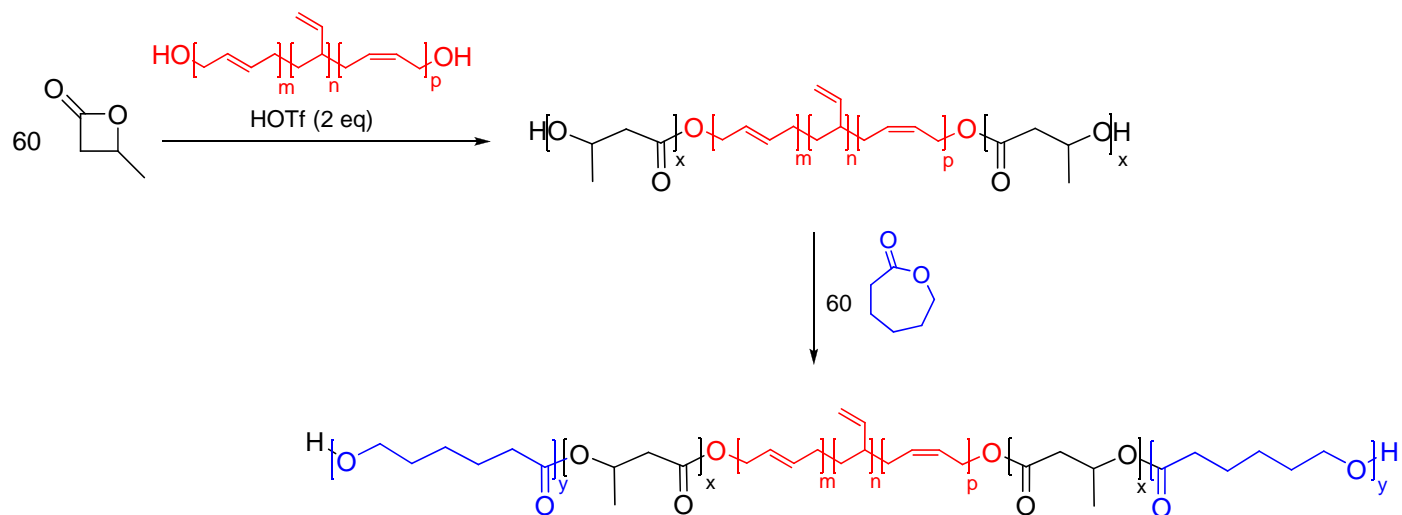

**Scheme S1.** Preparation of the block copolymer PCL-*b*-PBL-*b*-PBD-*b*-PBL-*b*-PCL: Polymerization conditions: Run 7 in Table S1.



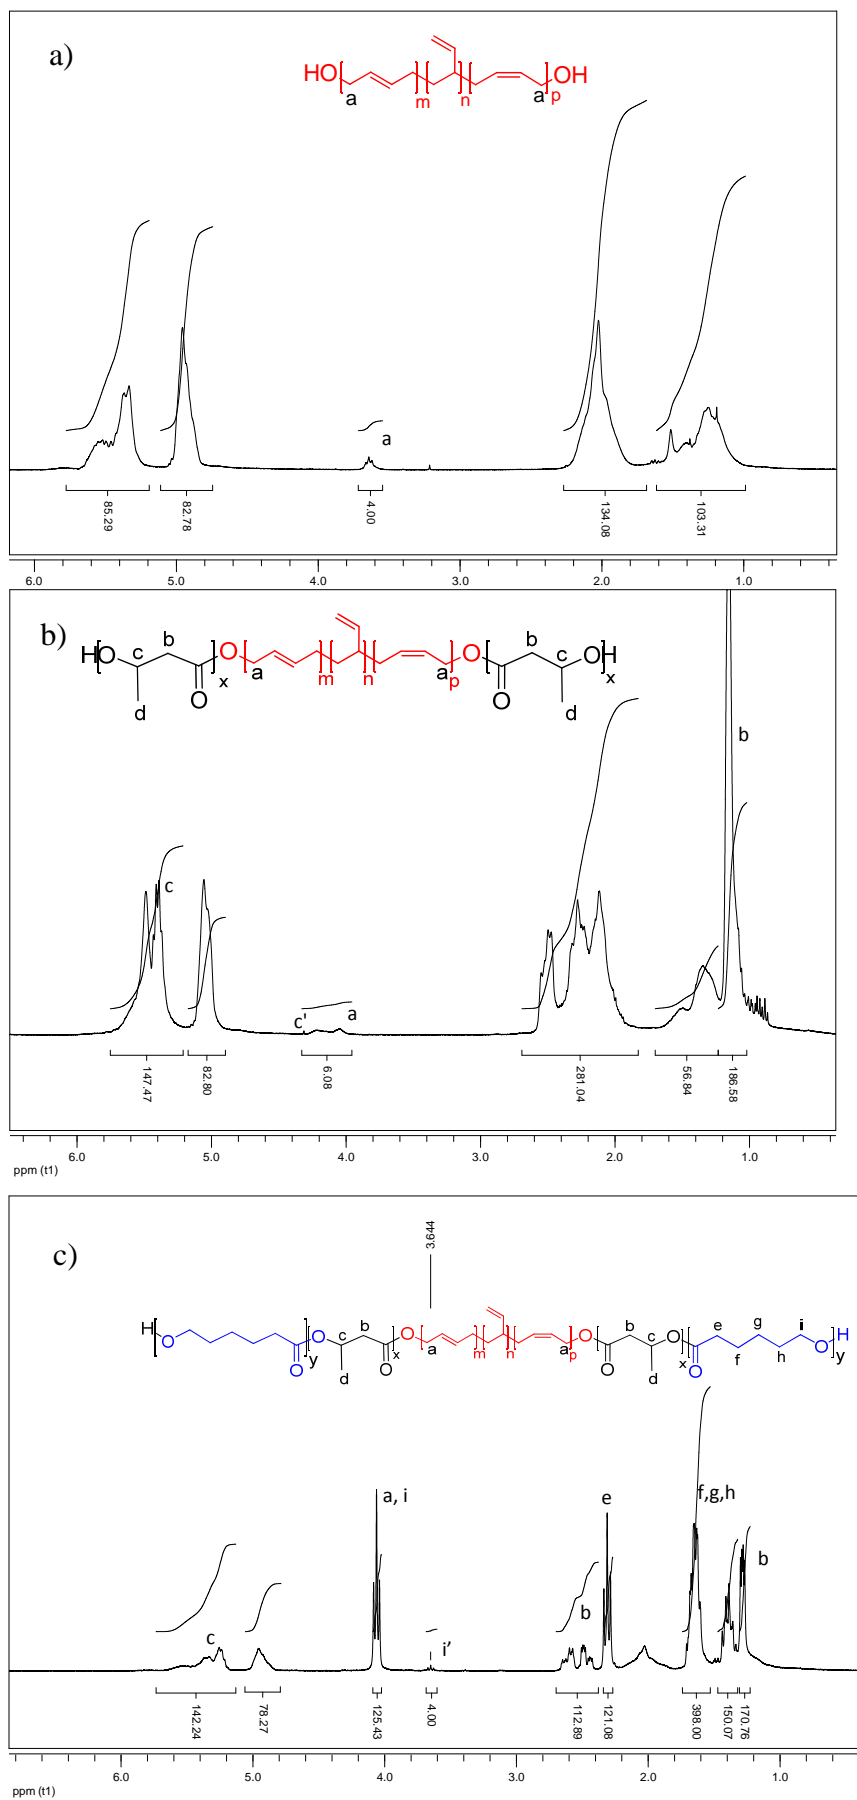

**Figure S10.**  $^1\text{H}$  NMR spectra ( $\text{CDCl}_3$ , 300 MHz) of the block copolymer PCL-*b*-PBL-*b*-PBD-*b*-PBL-*b*-PCL: Polymerization conditions: Run 7 in Table S1. a) PBD; b) PBL-*b*-PBD-*b*-PBL; c) PCL-*b*-PBL-*b*-PBD-*b*-PBL-*b*-PCL.

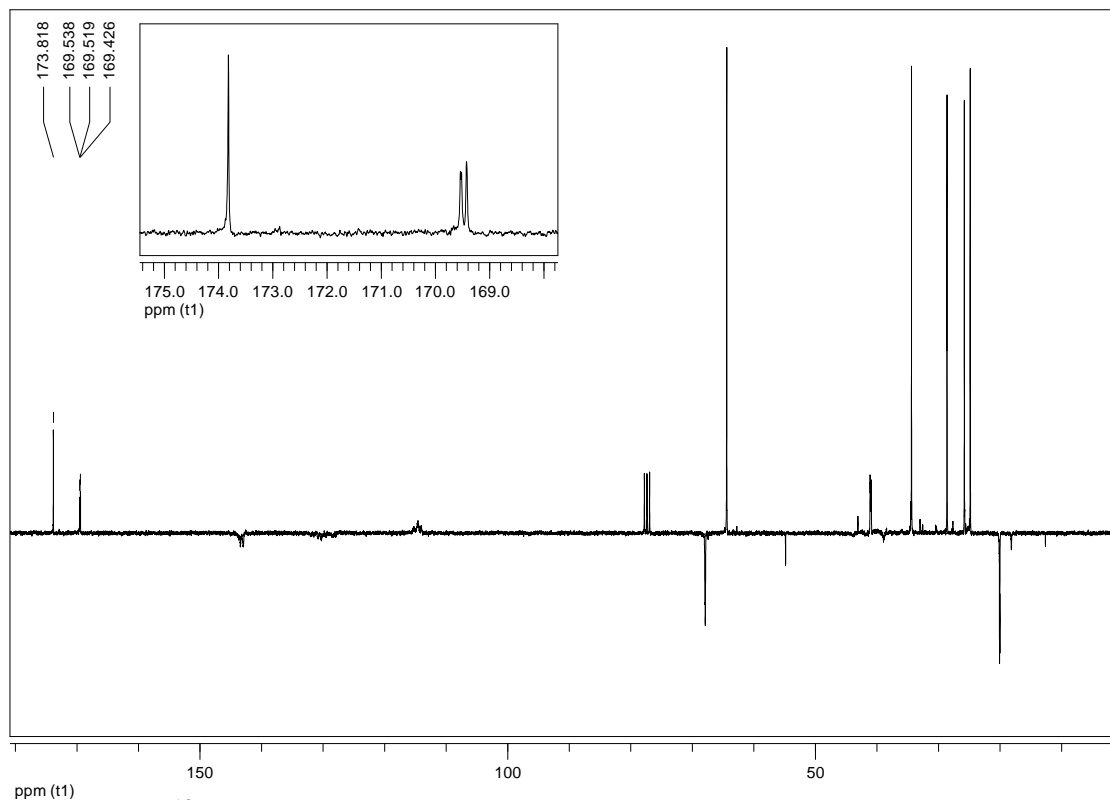

**Figure S11.**  $^{13}\text{C}$  NMR spectra ( $\text{CDCl}_3$ , 75 MHz) of the block copolymer  $\text{PCL-}b\text{-PBL-}b\text{-PBD-}b\text{-PBL-}b\text{-PCL}$ : Polymerization conditions: Run 7 in Table S1.

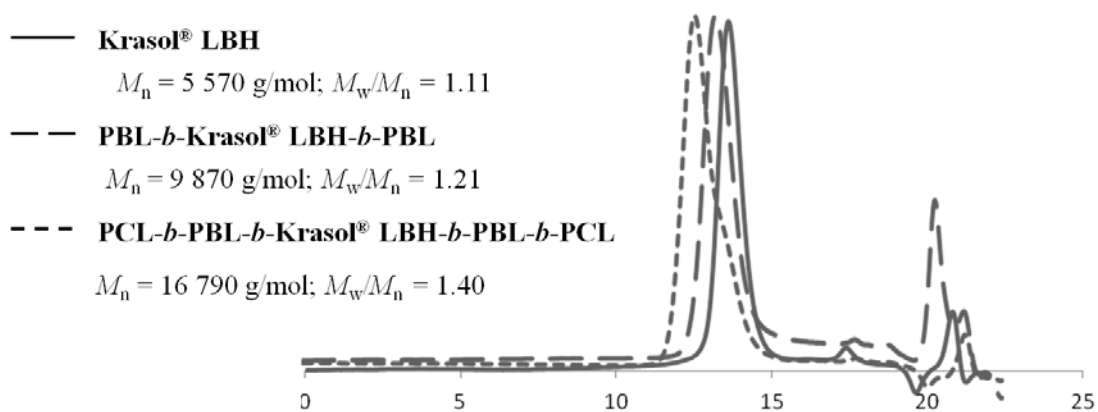

**Figure S12.** SEC traces of the telechelic  $\text{HO-PBL-}b\text{-PBD-}b\text{-PBL-OH}$  block and final  $\text{PCL-}b\text{-PBL-}b\text{-PBD-}b\text{-PBL-}b\text{-PCL}$  copolymer.
